# Supplementary material for: Health, psychosocial, and economic impacts of the COVID-19 pandemic on people with chronic conditions in India: a mixed methods study
Source: Springer Nature journal article supplement (doi:10.1186/s12889-021-10708-w), 2021-04-08
Supplement: MOESM2 [file 19046960]

## Supplementary file 1: Survey questionnaire

**Study title: Impact of COVID-19 pandemic on individuals with chronic conditions in India**

| Survey questionnaire              |                                                                                                                                                                                                                                                                                                               |                          | Date of Interview:           |                          |    |
|-----------------------------------|---------------------------------------------------------------------------------------------------------------------------------------------------------------------------------------------------------------------------------------------------------------------------------------------------------------|--------------------------|------------------------------|--------------------------|----|
| Participant Name:                 | Cohort Name:                                                                                                                                                                                                                                                                                                  | Place of residence:      | Age:<br>(in completed years) | Sex: M/F                 |    |
| Ownership of mobile phone: Yes/No |                                                                                                                                                                                                                                                                                                               |                          | Internet use/access: Yes/No  |                          |    |
| 1                                 | Have you ever been told by the doctor that you have any of the following conditions?                                                                                                                                                                                                                          |                          |                              |                          |    |
|                                   | Diabetes Mellitus                                                                                                                                                                                                                                                                                             | <input type="checkbox"/> | Yes                          | <input type="checkbox"/> | No |
|                                   | Blood pressure                                                                                                                                                                                                                                                                                                | <input type="checkbox"/> | Yes                          | <input type="checkbox"/> | No |
|                                   | Heart disease                                                                                                                                                                                                                                                                                                 | <input type="checkbox"/> | Yes                          | <input type="checkbox"/> | No |
|                                   | Kidney disease                                                                                                                                                                                                                                                                                                | <input type="checkbox"/> | Yes                          | <input type="checkbox"/> | No |
|                                   | Chronic Obstructive Pulmonary Disease                                                                                                                                                                                                                                                                         | <input type="checkbox"/> | Yes                          | <input type="checkbox"/> | No |
| 2                                 | During this COVID-19 related national lockdown, did you experience any acute medical illness or medical emergency? <input type="checkbox"/> Yes <input type="checkbox"/> No <input type="checkbox"/> Don't know                                                                                               |                          |                              |                          |    |
| 3                                 | How difficult was it to access healthcare facility for acute illness/emergency during lockdown?<br><input type="checkbox"/> Very difficult <input type="checkbox"/> Somewhat difficult <input type="checkbox"/> Neutral <input type="checkbox"/> Easy <input type="checkbox"/> Very easy                      |                          |                              |                          |    |
| 4                                 | Was the local health clinic/hospital functioning in your area/locality during lockdown?<br><input type="checkbox"/> Yes <input type="checkbox"/> No <input type="checkbox"/> Don't know                                                                                                                       |                          |                              |                          |    |
| 5                                 | How satisfied are you with your current access to treatment?<br>Very satisfied 6 [ ]    5 [ ]    4 [ ]    3 [ ]    2 [ ]    1 [ ]    0 [ ] Very dissatisfied                                                                                                                                                  |                          |                              |                          |    |
| <b>6.0</b>                        | <b>COVID-19 status in your family</b><br><i>(Instructions for the data collector: Explain briefly to the study participant, now I would like to ask a few questions about COVID-19 situation amongst your immediate family members (sons, daughters, parents) i.e. people residing in the same household)</i> |                          |                              |                          |    |
| 6.1                               | Were you diagnosed or treated for COVID-19?                                                                                                                                                                                                                                                                   | <input type="checkbox"/> | Yes                          | <input type="checkbox"/> | No |
| 6.2                               | If yes, were you hospitalized for COVID-19?                                                                                                                                                                                                                                                                   | <input type="checkbox"/> | Yes                          | <input type="checkbox"/> | No |
| 6.3                               | If yes, how long?                                                                                                                                                                                                                                                                                             | [ ] [ ]                  | number of days               |                          |    |
| 6.4                               | Were any of your immediate family members diagnosed with COVID-19?                                                                                                                                                                                                                                            | <input type="checkbox"/> | Yes                          | <input type="checkbox"/> | No |
| 6.5                               | If yes, were they hospitalized?                                                                                                                                                                                                                                                                               | <input type="checkbox"/> | Yes                          | <input type="checkbox"/> | No |
| 6.6                               | If yes, how long?                                                                                                                                                                                                                                                                                             | [ ] [ ]                  | number of days               |                          |    |
| 6.7                               | Did anyone die of COVID-19 in your immediate family?                                                                                                                                                                                                                                                          | <input type="checkbox"/> | Yes                          | <input type="checkbox"/> | No |
| 6.6                               | If yes, number of deaths?                                                                                                                                                                                                                                                                                     | [ ] [ ]                  |                              |                          |    |
| <b>7.0</b>                        | <b>Your current health status and impact of COVID-19 on chronic conditions (Q. Nos. 7.13 - 7.18 only for patients with diabetes)</b>                                                                                                                                                                          |                          |                              |                          |    |
| 7.1                               | Have you experienced difficulties accessing medication or treatment due to <b>COVID-19 situation</b> in the past month?                                                                                                                                                                                       | <input type="checkbox"/> | Yes                          | <input type="checkbox"/> | No |
|                                   | If yes, for which of the following?                                                                                                                                                                                                                                                                           |                          |                              |                          |    |
| 7.2-7.6                           | Diabetes Mellitus                                                                                                                                                                                                                                                                                             | <input type="checkbox"/> | Yes                          | <input type="checkbox"/> | No |
|                                   | Blood pressure                                                                                                                                                                                                                                                                                                | <input type="checkbox"/> | Yes                          | <input type="checkbox"/> | No |
|                                   | Heart disease                                                                                                                                                                                                                                                                                                 | <input type="checkbox"/> | Yes                          | <input type="checkbox"/> | No |
|                                   | Kidney disease                                                                                                                                                                                                                                                                                                | <input type="checkbox"/> | Yes                          | <input type="checkbox"/> | No |

|            |                                                                                                                                                                                                                                                                                                                                                                     |                                                                                                                                                                    |                             |                                     |
|------------|---------------------------------------------------------------------------------------------------------------------------------------------------------------------------------------------------------------------------------------------------------------------------------------------------------------------------------------------------------------------|--------------------------------------------------------------------------------------------------------------------------------------------------------------------|-----------------------------|-------------------------------------|
|            | Chronic obstructive pulmonary disease                                                                                                                                                                                                                                                                                                                               | <input type="checkbox"/> Yes                                                                                                                                       | <input type="checkbox"/> No |                                     |
| 7.7        | Have you experienced difficulties accessing medication or treatment due to <b>financial factors</b> in the past month? If yes, for which of the following?                                                                                                                                                                                                          | <input type="checkbox"/> Yes                                                                                                                                       | <input type="checkbox"/> No | <input type="checkbox"/> Don't know |
| 7.8-7.12   | Diabetes Mellitus                                                                                                                                                                                                                                                                                                                                                   | <input type="checkbox"/> Yes                                                                                                                                       | <input type="checkbox"/> No |                                     |
|            | Blood pressure                                                                                                                                                                                                                                                                                                                                                      | <input type="checkbox"/> Yes                                                                                                                                       | <input type="checkbox"/> No |                                     |
|            | Heart disease                                                                                                                                                                                                                                                                                                                                                       | <input type="checkbox"/> Yes                                                                                                                                       | <input type="checkbox"/> No |                                     |
|            | Kidney disease                                                                                                                                                                                                                                                                                                                                                      | <input type="checkbox"/> Yes                                                                                                                                       | <input type="checkbox"/> No |                                     |
|            | Chronic Obstructive Pulmonary Disease                                                                                                                                                                                                                                                                                                                               | <input type="checkbox"/> Yes                                                                                                                                       | <input type="checkbox"/> No |                                     |
| 7.13       | How frequently do you monitor your glucose at home?<br>Once every day <input type="checkbox"/> Once in two days <input type="checkbox"/><br>Once weekly <input type="checkbox"/> Twice weekly <input type="checkbox"/><br>Twice a month <input type="checkbox"/> Once a month <input type="checkbox"/><br>I do not monitor glucose at home <input type="checkbox"/> |                                                                                                                                                                    |                             |                                     |
| 7.14       | Have you had your fasting blood sugar tested during the lockdown?                                                                                                                                                                                                                                                                                                   | <input type="checkbox"/> Yes                                                                                                                                       | <input type="checkbox"/> No | <input type="checkbox"/> Don't know |
| 7.15       | Have you had your HbA1c tested during the lockdown?                                                                                                                                                                                                                                                                                                                 | <input type="checkbox"/> Yes                                                                                                                                       | <input type="checkbox"/> No | <input type="checkbox"/> Don't know |
| 7.16       | If yes, on what date?                                                                                                                                                                                                                                                                                                                                               | FBS test date: _____<br>HbA1c test date: _____                                                                                                                     |                             |                                     |
| 7.17       | What was your fasting blood sugar / HbA1c? [If you do not know exact number, do you know if it was under control or out of control?]                                                                                                                                                                                                                                | FBS (mg/dL): _____<br>HbA1c (%): _____<br>Blood sugar controlled:<br><input type="checkbox"/> Yes <input type="checkbox"/> No <input type="checkbox"/> Don't know  |                             |                                     |
| 7.18       | Have your symptoms of diabetes or high blood sugar worsened since your area/locality where you stay went on lockdown?                                                                                                                                                                                                                                               | <input type="checkbox"/> Yes                                                                                                                                       | <input type="checkbox"/> No | <input type="checkbox"/> Don't know |
| 7.19       | Was your blood pressure measured during the lockdown at home or a clinic/hospital?                                                                                                                                                                                                                                                                                  | <input type="checkbox"/> Yes                                                                                                                                       | <input type="checkbox"/> No | <input type="checkbox"/> Don't know |
| 7.20       | If yes, on what date?                                                                                                                                                                                                                                                                                                                                               |                                                                                                                                                                    |                             |                                     |
| 7.21       | What was your last blood pressure reading?<br>If you do not know can you tell if it was under control?                                                                                                                                                                                                                                                              | SBP (mmHg) _____<br>DBP (mmHg) _____<br>Blood pressure controlled:<br><input type="checkbox"/> Yes <input type="checkbox"/> No <input type="checkbox"/> Don't know |                             |                                     |
| 7.22       | Have your symptoms of hypertension or high blood pressure worsened since your area of residence went on lockdown?                                                                                                                                                                                                                                                   | <input type="checkbox"/> Yes                                                                                                                                       | <input type="checkbox"/> No | <input type="checkbox"/> Don't know |
| 7.23       | Have you experienced fear/stigma related to COVID-19 infection?                                                                                                                                                                                                                                                                                                     | <input type="checkbox"/> Yes                                                                                                                                       | <input type="checkbox"/> No | <input type="checkbox"/> Don't know |
| 7.24       | How are you coping with stress during the current COVID-19 situation?<br><input type="checkbox"/> very well <input type="checkbox"/> moderate <input type="checkbox"/> with difficulty <input type="checkbox"/> not applicable (no stress)                                                                                                                          |                                                                                                                                                                    |                             |                                     |
| <b>8.0</b> | <b>COVID-19 status and restrictions in your locality</b><br><i>[In this section, I would like to ask you few questions on the COVID 19 situation in your locality, any restriction on movement of people and goods]</i>                                                                                                                                             |                                                                                                                                                                    |                             |                                     |
| 8.1        | Have you heard of any confirmed cases of COVID-19 in other households in your locality?                                                                                                                                                                                                                                                                             | <input type="checkbox"/> Yes                                                                                                                                       | <input type="checkbox"/> No | <input type="checkbox"/> Don't know |
| 8.2-8.7    | In general, during the lockdown period,<br>If someone from outside your locality (like family or friends) wanted to visit your locality, were they allowed to enter the locality during the lockdown?                                                                                                                                                               | <input type="checkbox"/> Yes                                                                                                                                       | <input type="checkbox"/> No | <input type="checkbox"/> Don't know |

|             |                                                                                                                                                                                                               |                                                                                                                                      |                                    |                                                                           |
|-------------|---------------------------------------------------------------------------------------------------------------------------------------------------------------------------------------------------------------|--------------------------------------------------------------------------------------------------------------------------------------|------------------------------------|---------------------------------------------------------------------------|
|             | Were you able to leave the locality to buy food or other supplies?                                                                                                                                            | <input type="checkbox"/> Yes                                                                                                         | <input type="checkbox"/> No        | <input type="checkbox"/> Don't know                                       |
|             | Did you need permission to leave the cities/villages/towns?                                                                                                                                                   | <input type="checkbox"/> Yes                                                                                                         | <input type="checkbox"/> No        | <input type="checkbox"/> Don't know                                       |
|             | Were you able to gather with your neighbours for activities (e.g., morning walks/exercise/parties/festivals/religious practices/ weddings/funerals)?                                                          | <input type="checkbox"/> Yes                                                                                                         | <input type="checkbox"/> No        | <input type="checkbox"/> Don't know                                       |
|             | Were you able to visit neighbour's home in the locality (e.g., for meals or to play cards)?                                                                                                                   | <input type="checkbox"/> Yes                                                                                                         | <input type="checkbox"/> No        | <input type="checkbox"/> Don't know                                       |
|             | Are children in the locality/township allowed to freely play outside (for instance, in the streets)?                                                                                                          | <input type="checkbox"/> Yes                                                                                                         | <input type="checkbox"/> No        | <input type="checkbox"/> Don't know                                       |
| 8.8         | Do you know if the following measures were recommended by local/state/national governments to control COVID-19 spread?                                                                                        | <input type="checkbox"/> Yes                                                                                                         | <input type="checkbox"/> No        | <input type="checkbox"/> Don't know                                       |
|             | Hand washing                                                                                                                                                                                                  | <input type="checkbox"/> Yes                                                                                                         | <input type="checkbox"/> No        | <input type="checkbox"/> Don't know                                       |
|             | Social distancing                                                                                                                                                                                             | <input type="checkbox"/> Yes                                                                                                         | <input type="checkbox"/> No        | <input type="checkbox"/> Don't know                                       |
|             | Wearing mask                                                                                                                                                                                                  | <input type="checkbox"/> Yes                                                                                                         | <input type="checkbox"/> No        | <input type="checkbox"/> Don't know                                       |
|             | Cleaning fruits and vegetables before use                                                                                                                                                                     | <input type="checkbox"/> Yes                                                                                                         | <input type="checkbox"/> No        | <input type="checkbox"/> Don't know                                       |
| 8.9         | In general, are people required to wear masks when leaving their homes?                                                                                                                                       | <input type="checkbox"/> Yes                                                                                                         | <input type="checkbox"/> No        | <input type="checkbox"/> Don't know                                       |
| <b>9.0</b>  | <b>Availability of preventive measures and daily essentials</b>                                                                                                                                               |                                                                                                                                      |                                    |                                                                           |
| 9.1         | Are you able to buy any appropriate masks locally?                                                                                                                                                            | <input type="checkbox"/> Yes                                                                                                         | <input type="checkbox"/> No        | <input type="checkbox"/> Don't know                                       |
| 9.2         | Do you use any appropriate mask (surgical/home-made) while being outdoors?                                                                                                                                    | <input type="checkbox"/> Yes                                                                                                         | <input type="checkbox"/> No        | <input type="checkbox"/> Don't know                                       |
| 9.3-9.5     | Currently, please let us know about the availability of the following items in your locality                                                                                                                  |                                                                                                                                      |                                    |                                                                           |
|             | Fresh fruits/vegetables                                                                                                                                                                                       | <input type="checkbox"/> Yes                                                                                                         | <input type="checkbox"/> No        | <input type="checkbox"/> Don't know                                       |
|             | Groceries/supplies (e.g., rice, flour, and cooking oil)                                                                                                                                                       | <input type="checkbox"/> Yes                                                                                                         | <input type="checkbox"/> No        | <input type="checkbox"/> Don't know                                       |
|             | Animal foods like eggs/meat/non-vegetarian foods                                                                                                                                                              | <input type="checkbox"/> Yes                                                                                                         | <input type="checkbox"/> No        | <input type="checkbox"/> Don't know                                       |
| 9.6         | How has the price of general living materials changed compared to last year or pre lockdown?                                                                                                                  | <input type="checkbox"/> Increased                                                                                                   | <input type="checkbox"/> Decreased | <input type="checkbox"/> No change<br><input type="checkbox"/> Don't know |
| 9.7         | Have you heard of anyone who needed to leave the city for medical care (for any reason) but cannot see a doctor right now?                                                                                    | <input type="checkbox"/> Yes                                                                                                         | <input type="checkbox"/> No        | <input type="checkbox"/> Don't know                                       |
| <b>10.0</b> | <b>Consequences of COVID-19 on employment and household income</b>                                                                                                                                            |                                                                                                                                      |                                    |                                                                           |
| 10.1        | What is your current employment status?                                                                                                                                                                       | <input type="checkbox"/> Yes                                                                                                         | <input type="checkbox"/> No        | <input type="checkbox"/> Don't know                                       |
| 10.2        | Due to the lockdown, were you able to continue work?                                                                                                                                                          | <input type="checkbox"/> Work from home<br><input type="checkbox"/> No work<br><input type="checkbox"/> Went to work less frequently |                                    |                                                                           |
| 10.3        | Have you or members in your immediate family experienced a loss in job as a result of COVID-19?                                                                                                               | <input type="checkbox"/> Yes                                                                                                         | <input type="checkbox"/> No        | <input type="checkbox"/> Don't know                                       |
| 10.4        | Have you or members in your immediate family experienced a loss in income as a result of COVID-19?                                                                                                            | <input type="checkbox"/> Yes                                                                                                         | <input type="checkbox"/> No        | <input type="checkbox"/> Don't know                                       |
| 10.5        | Have you received any kind of financial support from the government? (applicable if there was loss of income, job or to those belonging to poor SES/ Jandhan account holders)                                 | <input type="checkbox"/> Yes                                                                                                         | <input type="checkbox"/> No        | <input type="checkbox"/> Don't know                                       |
| <b>11.0</b> | <b>Your health status: EQ-5D –Place a tick in one box in each group below for the statement that best describes your own health state today</b>                                                               |                                                                                                                                      |                                    |                                                                           |
| 11.1        | Mobility<br>1 <input type="checkbox"/> I have no problems in walking about<br>2 <input type="checkbox"/> I have some problems in walking about<br>3 <input type="checkbox"/> I am confined to bed             |                                                                                                                                      |                                    |                                                                           |
| 11.2        | Self-Care<br>1 <input type="checkbox"/> I have no problems with self-care<br>2 <input type="checkbox"/> I have some problems with self-care<br>3 <input type="checkbox"/> I am unable to wash or dress myself |                                                                                                                                      |                                    |                                                                           |

|             |                                                                                                                                                                                                                                                                                                                                               |                                                                                                                                                                                    |              |                    |                  |
|-------------|-----------------------------------------------------------------------------------------------------------------------------------------------------------------------------------------------------------------------------------------------------------------------------------------------------------------------------------------------|------------------------------------------------------------------------------------------------------------------------------------------------------------------------------------|--------------|--------------------|------------------|
| 11.3        | Usual Activities (e.g. work, study, housework, family or leisure activities)<br>1 <input type="checkbox"/> I have no problems with performing my usual activities<br>2 <input type="checkbox"/> I have some problems with performing my usual activities<br>3 <input type="checkbox"/> I am unable to perform my usual activities             |                                                                                                                                                                                    |              |                    |                  |
| 11.4        | Pain/Discomfort<br>1 <input type="checkbox"/> I have no pain or discomfort<br>2 <input type="checkbox"/> I have moderate pain or discomfort<br>3 <input type="checkbox"/> I have extreme pain or discomfort                                                                                                                                   |                                                                                                                                                                                    |              |                    |                  |
| 11.5        | Anxiety/Depression<br>1 <input type="checkbox"/> I am not worried or depressed<br>2 <input type="checkbox"/> I am moderately anxious or depressed<br>3 <input type="checkbox"/> I am extremely anxious or depressed                                                                                                                           |                                                                                                                                                                                    |              |                    |                  |
| 11.6        | Your health status on a scale of 0-100: ____ ____ ____                                                                                                                                                                                                                                                                                        |                                                                                                                                                                                    |              |                    |                  |
| <b>12.0</b> | <b>Generalized Anxiety Disorder 7-item (GAD-7) scale</b>                                                                                                                                                                                                                                                                                      |                                                                                                                                                                                    |              |                    |                  |
| 12.1        | Over the last 2 weeks, how often have you been bothered by the following problems?                                                                                                                                                                                                                                                            |                                                                                                                                                                                    |              |                    |                  |
|             |                                                                                                                                                                                                                                                                                                                                               | Not at all sure                                                                                                                                                                    | Several days | Over half the days | Nearly every day |
| 12.2        | Feeling nervous, anxious, or on edge                                                                                                                                                                                                                                                                                                          | 0                                                                                                                                                                                  | 1            | 2                  | 3                |
| 12.3        | Not being able to stop or control worrying                                                                                                                                                                                                                                                                                                    | 0                                                                                                                                                                                  | 1            | 2                  | 3                |
| 12.4        | Worrying too much about different things                                                                                                                                                                                                                                                                                                      | 0                                                                                                                                                                                  | 1            | 2                  | 3                |
| 12.5        | Trouble relaxing                                                                                                                                                                                                                                                                                                                              | 0                                                                                                                                                                                  | 1            | 2                  | 3                |
| 12.6        | Being so restless that it's hard to sit still                                                                                                                                                                                                                                                                                                 | 0                                                                                                                                                                                  | 1            | 2                  | 3                |
| 12.7        | Becoming easily annoyed or irritable                                                                                                                                                                                                                                                                                                          | 0                                                                                                                                                                                  | 1            | 2                  | 3                |
| 12.8        | Feeling afraid as if something awful might happen                                                                                                                                                                                                                                                                                             | 0                                                                                                                                                                                  | 1            | 2                  | 3                |
| 12.9        | If you checked off any problems, how difficult have these made it for you to do your work, take care of things at home, or get along with other people?<br><br><input type="checkbox"/> Not difficult at all <input type="checkbox"/> Somewhat difficult <input type="checkbox"/> Very difficult <input type="checkbox"/> Extremely difficult |                                                                                                                                                                                    |              |                    |                  |
| <b>13.0</b> | <b>Impact of COVID-19 on diet and physical activity</b>                                                                                                                                                                                                                                                                                       |                                                                                                                                                                                    |              |                    |                  |
| 13.1        | In the past one week, how many days did you adhere to a meal plan with low/restricted salt/sugar/fat?                                                                                                                                                                                                                                         | <input type="checkbox"/> 0 days<br><input type="checkbox"/> 1 day<br><input type="checkbox"/> 2 days<br><input type="checkbox"/> 3 days<br><input type="checkbox"/> 4 or more days |              |                    |                  |
| 13.2        | In the past one week on how many days did you have irregular eating pattern (e.g. change in meal time/ frequent snacking)?                                                                                                                                                                                                                    | <input type="checkbox"/> 0 days<br><input type="checkbox"/> 1 day<br><input type="checkbox"/> 2 days<br><input type="checkbox"/> 3 days<br><input type="checkbox"/> 4 or more days |              |                    |                  |

|      |                                                                                                                      |                                                                                                                                                                                                                                   |
|------|----------------------------------------------------------------------------------------------------------------------|-----------------------------------------------------------------------------------------------------------------------------------------------------------------------------------------------------------------------------------|
| 13.3 | During the lockdown, did the quantity of fruits and vegetables consumed change compared to pre lockdown period?      | <input type="checkbox"/> Yes, I consumed less F&V<br><input type="checkbox"/> Yes, I consumed more F&V<br><input type="checkbox"/> No, I consumed the same amount of F&V                                                          |
| 13.4 | In the past one week, on how many days were you able to perform moderate physical activity for more than 10 minutes? | <input type="checkbox"/> 0 days<br><input type="checkbox"/> 1 day<br><input type="checkbox"/> 2 days<br><input type="checkbox"/> 3 days<br><input type="checkbox"/> 4 or more days                                                |
| 13.5 | During the lockdown did the duration and intensity of physical activity change compared to pre-lockdown period?      | <input type="checkbox"/> Yes, I performed less physical activity<br><input type="checkbox"/> Yes, I performed more physical activity<br><input type="checkbox"/> No, I performed same duration and intensity of physical activity |

## Qualitative Study Interview Guide — Patient version 1.0; Date: 01 June 2020

1. Please can you describe how long you have been diagnosed with and/or taking treatment for your chronic condition(s): diabetes/hypertension/CVD/CKD/COPD?
2. What are the greatest challenges that you are facing due to the COVID19 outbreak and lockdown?
  - a. Please describe what changes/adjustments have you brought into your routine life due to the COVID19 outbreak?
    - i. How do you protect yourself from the COVID19?
  - b. How the COVID19 situation has impacted on managing your chronic condition, in terms of:
    - i. lifestyle behaviours/self-care goals: diet, exercise, stress/depression, tobacco/smoking, alcohol use (as applicable)
    - ii. taking prescribed medications (access, affordability)
    - iii. clinic visit
    - iv. lab tests
  - c. Next, we want to understand whether or not, COVID19 related lockdown influenced your livelihood/employment/income-either for you or your family members?
    - i. How the COVID-19 related lockdown in your city affected children's education?
    - ii. Please can you describe if you have experienced any sort of fear or stigma related to COVID-19?
3. Please can you suggest, how we can overcome some of these challenges: at individual-level, and society-level (if any)
4. List any two points that we can learn from this current situation: positive/negative for your family/society/state/country
5. What are two things that you will change in your life when the COVID-19 crisis is over?
6. Is there anything else that you want to discuss regarding COVID-19 impacts that we have not covered earlier?
